# Supplementary material
Source: PubMed Central journal article supplement (PMC5210124)
Supplement: EMBJ-36-102-s001.pdf [file EMBJ-36-102-s001.pdf]

## **Appendix**

### **IL-1 signaling is critical for expansion but not generation of autoreactive GM-CSF<sup>+</sup> Th17 cells**

Ilgiz A. Mufazalov, Carsten Schelmbauer, Tommy Regen, Janina Kuschmann, Florian Wanke, Lauren A. Gabriel, Judith Hauptmann, Werner Müller, Emmanuel Pinteaux, Florian C. Kurschus and Ari Waisman

### **Table of Contents**

- 1. Appendix Figures S1-S5.**
- 2. Appendix Table S1, S2.**

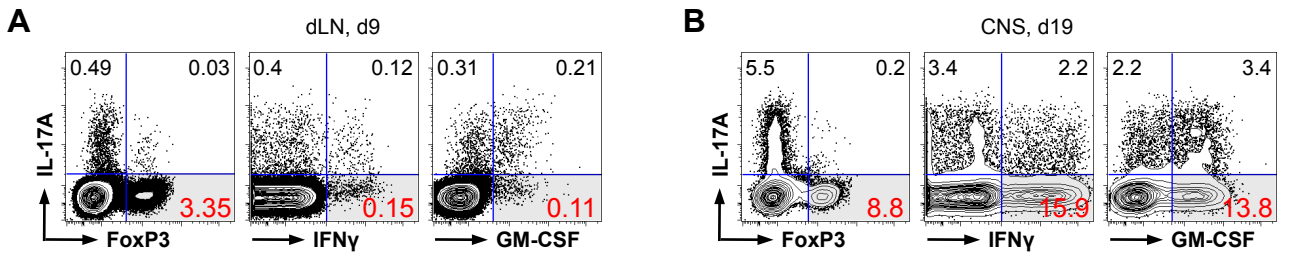

**Appendix Fig S1. Analysis of CD4 T cell development after EAE induction.**

A-B – Analysis of cytokine and FoxP3 expression by CD4 T cells isolated from (A) dLN and (B) CNS at the peak of disease. Filled subpopulations were further analyzed for IL-1R1 expression depicted in Fig 2A and C.

Cells were isolated (A) at day 9 after immunization and (B) at the peak of EAE and restimulated in the presence of MOG for 6 h. Data are representative FACS plots, gated on VD-TCR $\beta$ <sup>+</sup>CD4<sup>+</sup> cells with mean frequencies per group and consist of n=4 wild type mice immunized with MOG/CFA/PTx. Experiments were performed at least twice with similar results.

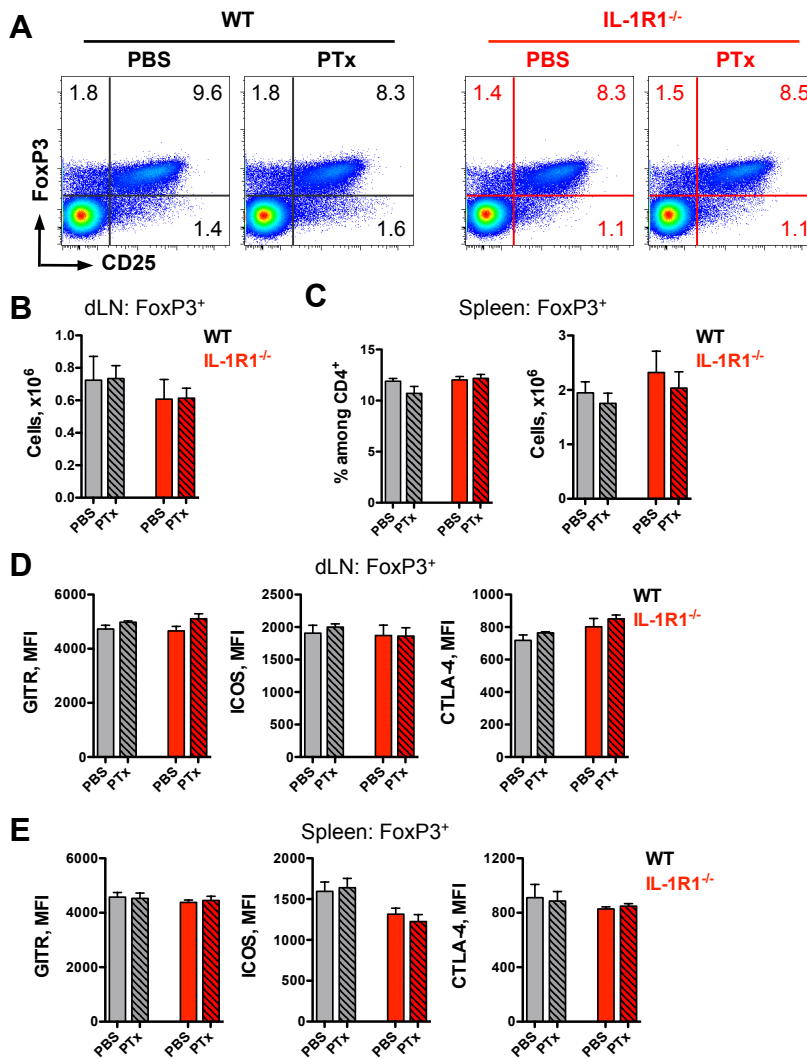

**Appendix Fig S2. Treg cell development is not dependent on IL-1 signaling and PTx administration.**

A - Analysis of Treg cells isolated from dLN. Data are representative FACS plots, gated on VD<sup>-</sup>TCRβ<sup>+</sup>CD4<sup>+</sup> cells with mean frequencies per group.

B - Total numbers (mean +SEM) of Treg cells isolated from dLN shown in (A).

C - Frequencies and total numbers (mean +SEM) of Treg cells isolated from the spleen.

D-E - Mean fluorescent intensity (mean +SEM) of GITR, ICOS and CTLA-4 staining by Treg cells isolated from the dLN (D) and spleen (E).

Cells (A-E) were isolated at day 9 after immunization. Data consist of n=5 WT PBS, n=4 WT PTx, n=4 IL-1R1<sup>-/-</sup> PBS, n=4 IL-1R1<sup>-/-</sup> PTx, MOG/CFA immunized mice. Experiments were performed twice with similar results.

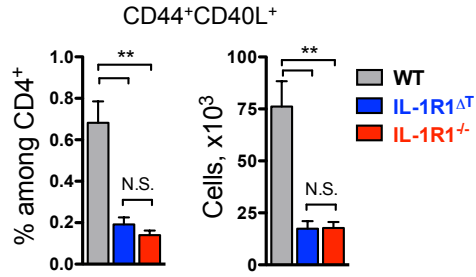

**Appendix Fig S3. T cell specific deletion of IL-1R1 impairs MOG-specific CD4 T cell expansion.**

Frequencies and total numbers (mean +SEM) of CD44<sup>+</sup>CD40L<sup>+</sup> CD4 T cells isolated from the spleen (depicted in Fig 4B).

Cells were isolated at day 9 after MOG/CFA/PTx immunization and restimulated in the presence of MOG for 6 h. Data consist of n=5 mice of each genotype. \*\*p < 0.01, \*\*\*p < 0.001, N.S. – not significant; two-tailed unpaired t-test. Experiments were performed twice with similar results.

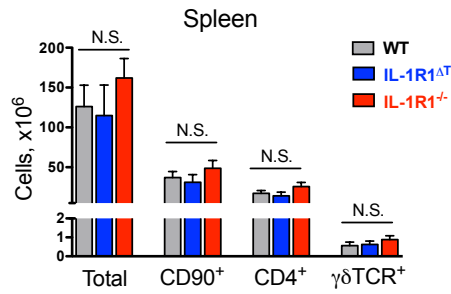

**Appendix Fig S4. IL-1R1 deficient mice display non-impaired total cellularity in the spleen after MOG/CFA/PTx immunization.**

Total numbers (mean +SEM) of different cell types isolated from the spleen of mice after EAE induction (depicted in Fig 5D).

Data consist of n=4 WT, n=3 IL-1R1<sup>ΔT</sup>, n=3 IL-1R1<sup>-/-</sup> mice. N.S. – not significant; two-tailed unpaired t-test. Experiments were performed at least twice with similar results.

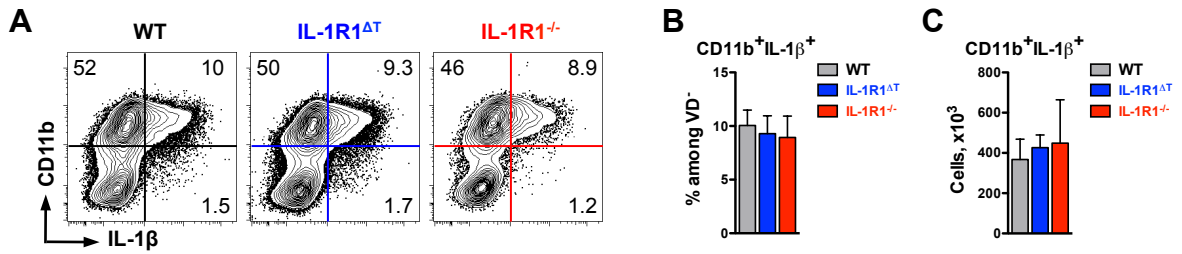

**Appendix Fig S5. Analysis of IL-1 $\beta$  expression within the inflamed CNS during adoptive transfer EAE.**

A - Analysis of IL-1 $\beta$  expression by cells isolated from the CNS of Rag1<sup>-/-</sup> EAE diseased mice which received IL-23 polarized cells of the indicated genotypes (depicted in Fig 6F). Data are representative FACS plots with mean frequencies per group, gated on VD<sup>-</sup> cells.

B – Frequencies (mean +SEM) of CD11b<sup>+</sup>IL-1 $\beta$ <sup>+</sup> cells isolated from the CNS shown in (A).

C - Total numbers (mean +SEM) of CD11b<sup>+</sup>IL-1 $\beta$ <sup>+</sup> cells isolated from the CNS shown in (A).

Data (A-C) consist of Rag1<sup>-/-</sup> mice which received WT (n=6), IL-1R1<sup>ΔT</sup> (n=3) and IL-1R1<sup>-/-</sup> (n=4) cells polarized in the presence of IL-23 prior to transfer. Experiments were performed twice with similar results.

**Appendix Table S1. Anti-mouse FACS antibodies used for surface staining.**

| <b>Ag</b>           | <b>Supplier</b> |
|---------------------|-----------------|
| CD11c               | eBioscience     |
| CD11c               | BD Biosciences  |
| CD11b               | eBioscience     |
| Ly6G                | Biolegend       |
| Ly6C                | BD Biosciences  |
| TCR- $\beta$        | BD Biosciences  |
| TCR- $\beta$        | Biolegend       |
| CD44                | Biolegend       |
| CD44                | BD Biosciences  |
| CD4                 | Biolegend       |
| CD4                 | BD Biosciences  |
| CD25                | BD Biosciences  |
| ICOS                | eBioscience     |
| GITR                | Biolegend       |
| CD45.2              | eBioscience     |
| CD90.2              | eBioscience     |
| CD90.2              | Biolegend       |
| B220                | Biolegend       |
| TCR- $\gamma\delta$ | eBioscience     |
| CD19                | Biolegend       |
| CD3                 | BD Biosciences  |

**Appendix Table S2. Anti-mouse FACS antibodies used for intracellular staining.**

| <b>Ag</b>        | <b>Supplier</b> |
|------------------|-----------------|
| IL-17A           | eBioscience     |
| CD40L            | Biolegend       |
| IFN $\gamma$     | BD Biosciences  |
| IFN $\gamma$     | eBioscience     |
| GM-CSF           | eBioscience     |
| pro-IL-1 $\beta$ | eBioscience     |
| IL-1 $\alpha$    | Biolegend       |
| IL-1R1           | Biolegend       |
| FoxP3            | eBioscience     |
| CTLA4            | BD Biosciences  |
| CCR6             | Biolegend       |

Isotype:

Armenian Hamster IgG Biolegend
