# Supplementary material
Source: PubMed Central journal article supplement (PMC5210124)
Supplement: EMBJ-36-102-s002.pdf [file EMBJ-36-102-s002.pdf]

## Expanded View Figures

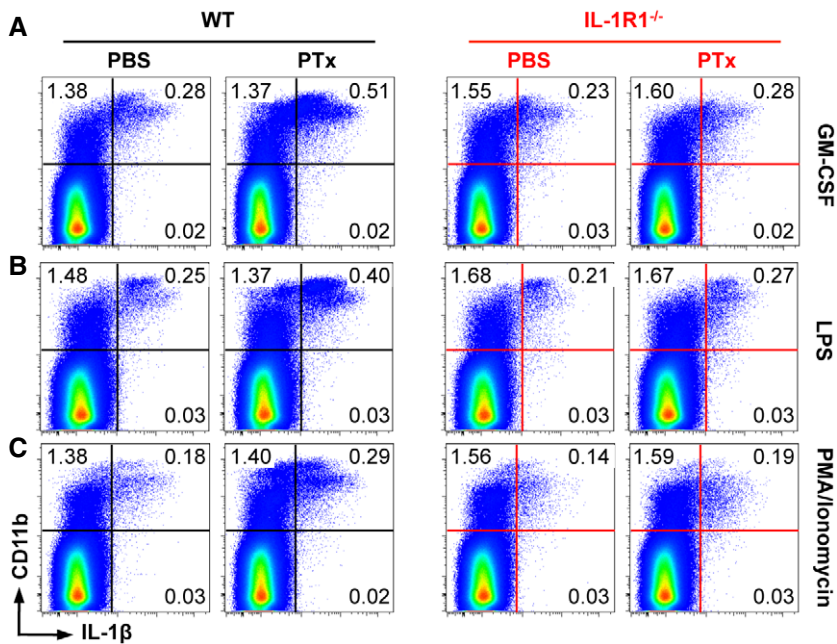

**Figure EV1. Myeloid cells are the main source of IL-1β upon MOG/CFA/PTx immunization.**

A–C Analysis of IL-1β expression by cells isolated from the dLN and stimulated with GM-CSF (A), LPS (B), and PMA/ionomycin (C). Data are representative FACS plots gated on VD<sup>-</sup> cells with mean frequencies per group.

Data information: Cells (A–C) were isolated at day 7 after immunization and stimulated in the presence of monensin with indicated stimuli for 4 h. Data consist of  $n = 4$  WT PBS-,  $n = 3$  IL-1R1<sup>-/-</sup> PBS-,  $n = 4$  WT PTx-,  $n = 3$  IL-1R1<sup>-/-</sup> PTx MOG/CFA-immunized mice. Experiments were performed twice with similar results.

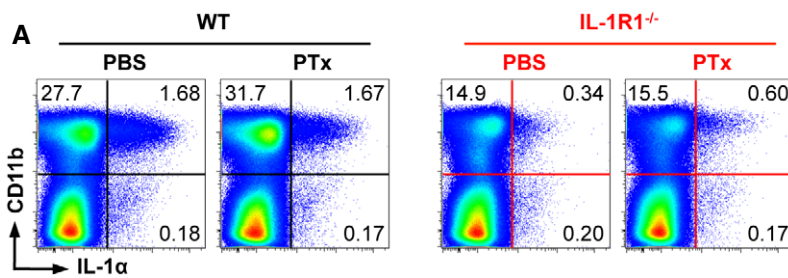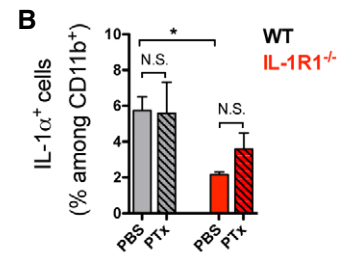

**Figure EV2. Myeloid cells are the main source of IL-1α upon MOG/CFA/PTx immunization.**

A Analysis of IL-1α expression by cells isolated from the spleen and stimulated with GM-CSF. Data are representative FACS plots, gated on VD<sup>-</sup> cells with mean frequencies per group.

B Frequencies (mean + SEM) of IL-1α expression by CD11b<sup>+</sup> cells shown in (A).

Data information: Cells (A, B) were isolated at day 7 after immunization and were stimulated with 20 ng/ml GM-CSF for 4 h in the presence of monensin. Data consist of  $n = 4$  WT PBS-,  $n = 3$  IL-1R1<sup>-/-</sup> PBS-,  $n = 4$  WT PTx-, and  $n = 3$  IL-1R1<sup>-/-</sup> PTx MOG/CFA-immunized mice. \* $P < 0.05$ , N.S., not significant; two-tailed unpaired t-test. Experiments were performed twice with similar results.

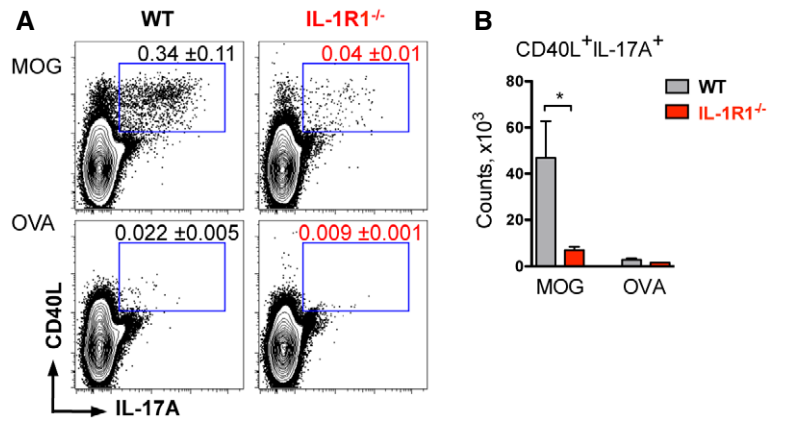

**Figure EV3. IL-1R1 deletion impairs MOG-specific Th17 cell expansion.**

A Analysis of IL-17A expression by CD4 T cells isolated from the spleen and restimulated with MOG or OVA for 6 h.

B Total cell numbers of antigen-specific Th17 cells isolated from the spleen shown in (A).

Data information: Cells (A, B) were isolated at day 9 after MOG/CFA/PTx immunization of  $n = 4$  mice of each genotype. Data are (A) representative FACS plots, gated on  $VD^{-}TCR\beta^{+}CD4^{+}CD44^{+}$  cells with mean frequencies among CD4 T cells per group  $\pm$  SEM and (B) bar diagram (mean  $\pm$  SEM). \* $P < 0.05$ , N.S., not significant; two-tailed unpaired  $t$ -test.

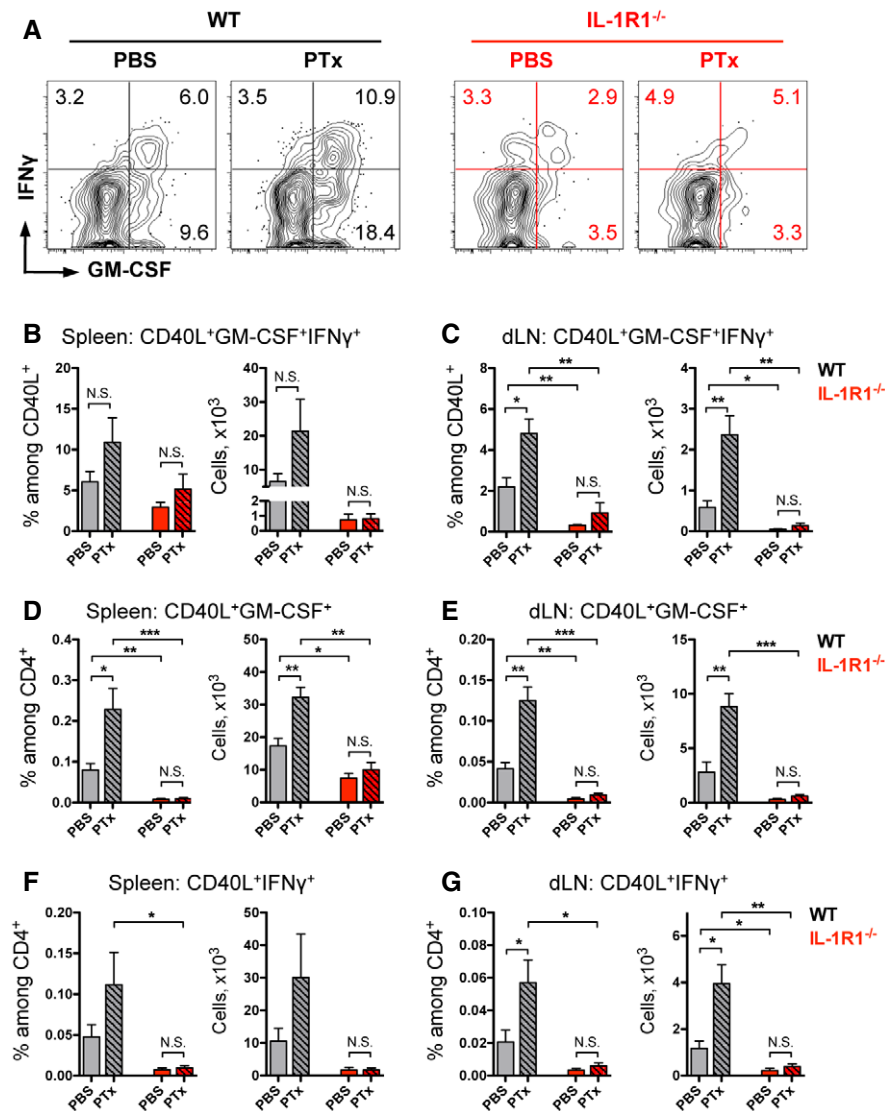

**Figure EV4. IL-17A-related cytokine expression by CD4 T cells is dependent on IL-1R1 signaling.**

A–G Analysis of cytokine expression by CD4 T cells isolated from the (A, B, D, F) spleen and (C, E, G) dLN (depicted in Fig 3). Frequencies and total numbers of MOG-specific (B, C) GM-CSF<sup>+</sup>IFN $\gamma$ <sup>+</sup> cells, (D, E) GM-CSF<sup>+</sup> cells, and (F, G) IFN $\gamma$ <sup>+</sup> cells. Data (A) are representative FACS plots, gated on  $VD^{-}TCR\beta^{+}CD4^{+}CD44^{+}CD40L^{+}$  cells with mean frequencies among CD4<sup>+</sup>CD40L<sup>+</sup> cells per group, and (B–G) bar diagram (mean  $\pm$  SEM).

Data information: Cells (A–G) were isolated at day 9 after immunization and restimulated in the presence of MOG for 6 h. Data consist of  $n = 5$  WT PBS-,  $n = 4$  WT PTx-,  $n = 4$  IL-1R1<sup>-/-</sup> PBS-,  $n = 4$  IL-1R1<sup>-/-</sup> PTx MOG/CFA-immunized mice. \* $P < 0.05$ , \*\* $P < 0.01$ , \*\*\* $P < 0.001$ , N.S., not significant; two-tailed unpaired  $t$ -test. Experiments were performed at least twice with similar results.

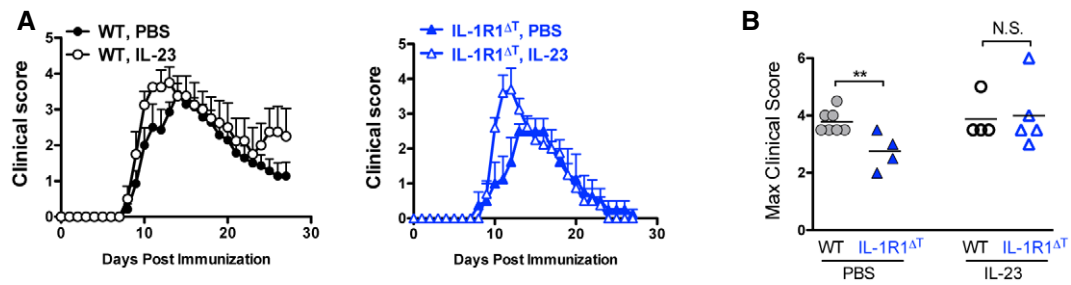

**Figure EV5. IL-23 promotes EAE severity in IL-1R1-deficient mice.**

A EAE clinical scores (mean + SEM) of mice treated with IL-23 or PBS.

B Maximal EAE clinical scores (individual plots with mean) of mice shown in (A).

Data information: Mice were actively immunized with MOG/CFA/PTx and treated i.p. with either PBS or IL-23 (1  $\mu$ g/mouse) at day 3, 5, 7, 9, 11, and 13. Data consist of  $n = 7$  WT PBS-,  $n = 4$  IL-1R1<sup>ΔT</sup> PBS-,  $n = 4$  WT IL-23-, and  $n = 5$  IL-1R1<sup>ΔT</sup> IL-23-treated mice. \*\* $P < 0.01$ , N.S., not significant; two-tailed unpaired  $t$ -test. Experiments were performed twice with similar results.
